# Supplementary material
Source: ML conference proceedings conference paper supplement (https://openreview.net/forum?id=lJDESIaOh11)
Supplement: supplementary_material [file attachment]

# SUPPLEMENTARY MATERIAL

## – PATHOLOGICAL VISUAL QUESTION ANSWERING

**Anonymous authors**

Paper under double-blind review

### 1 CODE

The code is available on Anonymous Github. <https://anonymous.4open.science/r/f4d98701-c90c-42ab-a98c-80910a0cf05a/>

The paths for different methods are listed in Table 1.

Table 1: Code for different methods

| Name                                     | Links                                                                |
|------------------------------------------|----------------------------------------------------------------------|
| Method 1 without image                   | <a href="#">method1/src/tasks/pvqa.py</a> <sup>1</sup>               |
| Method 1                                 | <a href="#">method1/src/tasks/pvqa.py</a> <sup>1</sup>               |
| Method 1 with ignoring                   | <a href="#">method1/src/tasks/pvqa_ignoring.py</a> <sup>1</sup>      |
| Method 1 with CMSSL-IQ                   | <a href="#">method1/src/pretrain/lxmert_pretrain.py</a> <sup>1</sup> |
| Method 1 with CMSSL-IA                   | <a href="#">method1/src/pretrain/lxmert_pretrain.py</a> <sup>1</sup> |
| Method 1 with SSL-QA                     | <a href="#">method1/src/pretrain/lxmert_pretrain.py</a> <sup>1</sup> |
| Method 1 with joint pretraining          | <a href="#">method1/src/pretrain/lxmert_pretrain.py</a> <sup>1</sup> |
| Method 1 with joint pretraining+ignoring | <a href="#">method1/src/tasks/pvqa_ignoring.py</a> <sup>1</sup>      |
| Method 2 without image                   | <a href="#">method2/finetune_main.py</a> <sup>1</sup>                |
| Method 2                                 | <a href="#">method2/finetune_main.py</a> <sup>1</sup>                |
| Method 2 with ignoring                   | <a href="#">method2/finetune_main_ignore.py</a> <sup>1</sup>         |
| Method 2 with CMSSL-IQ                   | <a href="#">method2/pretrain_main.py</a> <sup>1</sup>                |
| Method 2 with CMSSL-IA                   | <a href="#">method2/pretrain_main.py</a> <sup>1</sup>                |
| Method 2 with SSL-QA                     | <a href="#">method2/pretrain_main.py</a> <sup>1</sup>                |
| Method 2 with joint pretraining          | <a href="#">method2/pretrain_main.py</a> <sup>1</sup>                |
| Method 2 with joint pretraining+ignoring | <a href="#">method2/finetune_main_ignore.py</a> <sup>1</sup>         |

<sup>1</sup><https://anonymous.4open.science/r/f4d98701-c90c-42ab-a98c-80910a0cf05a/>

### 2 EXPERIMENTAL SETUP

The data split is performed to ensure the frequencies of question types in training, validation, and testing set to be consistent, and most words of the vocabulary exist in each set. The ratio of training set size, validation set size, and test set size is 3:1:1. We implement the methods using PyTorch and perform training on four GTX 1080Ti GPUs.

### 3 HYPERPARAMETER SETTINGS

The hyperparameter settings in each experiment are specified in Table 2-15.

Table 2: Hyperparameter settings for Method 1

| Name          | Value               | Description                                                      |
|---------------|---------------------|------------------------------------------------------------------|
| Optimizer     | Adam                | -                                                                |
| Learning rate | 0.00005             | Cosine scheduling                                                |
| <b>Beta</b>   | <b>(0.9, 0.999)</b> | Adam coefficients used for computing gradients and their squares |
| Max epoch     | 200                 | -                                                                |
| Batch size    | 32                  | -                                                                |

Table 3: Hyperparameter settings for Method 1 with ignoring

| Name                                 | Value               | Description                                                      |
|--------------------------------------|---------------------|------------------------------------------------------------------|
| Optimizer                            | Adam                | -                                                                |
| Optimizer for ignoring variables     | Adam                | -                                                                |
| Learning rate                        | 0.00005             | Cosine scheduling                                                |
| Learning rate for ignoring variables | 0.1                 | Weight decay with a rate of 3e-4                                 |
| <b>Beta</b>                          | <b>(0.9, 0.999)</b> | Adam coefficients used for computing gradients and their squares |
| <b>Beta for ignoring variables</b>   | <b>(0.5, 0.999)</b> | Adam coefficients used for computing gradients and their squares |
| Max epoch                            | 120                 | -                                                                |
| Batch size                           | 16                  | -                                                                |

Table 4: Hyperparameter settings for Method 1 with CMSSL-IQ

|             | Name          | Value               | Description                                                      |
|-------------|---------------|---------------------|------------------------------------------------------------------|
| Pretraining | Optimizer     | Adam                | -                                                                |
|             | Learning rate | 0.0001              | Cosine scheduling                                                |
|             | <b>Beta</b>   | <b>(0.5, 0.999)</b> | Adam coefficients used for computing gradients and their squares |
|             | Max epoch     | 30                  | -                                                                |
|             | Batch size    | 256                 | -                                                                |
| Finetuning  | Optimizer     | Adam                | -                                                                |
|             | Learning rate | 0.00005             | Cosine scheduling                                                |
|             | <b>Beta</b>   | <b>(0.9, 0.999)</b> | Adam coefficients used for computing gradients and their squares |
|             | Max epoch     | 200                 | -                                                                |
|             | Batch size    | 32                  | -                                                                |

Table 5: Hyperparameter settings for Method 1 with CMSSL-IA

|             | Name          | Value               | Description                                                      |
|-------------|---------------|---------------------|------------------------------------------------------------------|
| Pretraining | Optimizer     | Adam                | -                                                                |
|             | Learning rate | 0.0001              | Cosine scheduling                                                |
|             | <b>Beta</b>   | <b>(0.5, 0.999)</b> | Adam coefficients used for computing gradients and their squares |
|             | Max epoch     | 30                  | -                                                                |
|             | Batch size    | 256                 | -                                                                |
| Finetuning  | Optimizer     | Adam                | -                                                                |
|             | Learning rate | 0.00005             | Cosine scheduling                                                |
|             | <b>Beta</b>   | <b>(0.9, 0.999)</b> | Adam coefficients used for computing gradients and their squares |
|             | Max epoch     | 200                 | -                                                                |
|             | Batch size    | 32                  | -                                                                |

Table 6: Hyperparameter settings for Method 1 with SSL-QA

|             | Name          | Value               | Description                                                      |
|-------------|---------------|---------------------|------------------------------------------------------------------|
| Pretraining | Optimizer     | Adam                | -                                                                |
|             | Learning rate | 0.0001              | Cosine scheduling                                                |
|             | <b>Beta</b>   | <b>(0.5, 0.999)</b> | Adam coefficients used for computing gradients and their squares |
|             | Max epoch     | 30                  | -                                                                |
|             | Batch size    | 256                 | -                                                                |
| Finetuning  | Optimizer     | Adam                | -                                                                |
|             | Learning rate | 0.00005             | Cosine scheduling                                                |
|             | <b>Beta</b>   | <b>(0.9, 0.999)</b> | Adam coefficients used for computing gradients and their squares |
|             | Max epoch     | 200                 | -                                                                |
|             | Batch size    | 32                  | -                                                                |

Table 7: Hyperparameter settings for Method 1 with joint pretraining

|             | Name                                 | Value               | Description                                                      |
|-------------|--------------------------------------|---------------------|------------------------------------------------------------------|
| Pretraining | Optimizer                            | Adam                | -                                                                |
|             | Learning rate                        | 0.0001              | Cosine scheduling                                                |
|             | <b>Beta</b>                          | <b>(0.5, 0.999)</b> | Adam coefficients used for computing gradients and their squares |
|             | Max epoch                            | 30                  | -                                                                |
|             | Batch size                           | 256                 | -                                                                |
| Finetuning  | Optimizer                            | Adam                | -                                                                |
|             | Optimizer for ignoring variables     | Adam                | -                                                                |
|             | Learning rate                        | 0.00005             | Cosine scheduling                                                |
|             | Learning rate for ignoring variables | 0.1                 | Weight decay with a rate of 3e-4                                 |
|             | <b>Beta</b>                          | <b>(0.9, 0.999)</b> | Adam coefficients used for computing gradients and their squares |
|             | Max epoch                            | 200                 | -                                                                |
|             | Batch size                           | 32                  | -                                                                |

Table 8: Hyperparameter settings for Method 1 with joint pretraining+ignoring

|             | Name                                 | Value        | Description                                                      |
|-------------|--------------------------------------|--------------|------------------------------------------------------------------|
| Pretraining | Optimizer                            | Adam         | -                                                                |
|             | Learning rate                        | 0.0001       | Cosine scheduling                                                |
|             | Beta                                 | (0.5, 0.999) | Adam coefficients used for computing gradients and their squares |
|             | Max epoch                            | 30           | -                                                                |
|             | Batch size                           | 256          | -                                                                |
| Finetuning  | Optimizer                            | Adam         | -                                                                |
|             | Optimizer for ignoring variables     | Adam         | -                                                                |
|             | Learning rate                        | 0.00005      | Cosine scheduling                                                |
|             | Learning rate for ignoring variables | 0.1          | Weight decay with a rate of 3e-4                                 |
|             | Beta                                 | (0.9, 0.999) | Adam coefficients used for computing gradients and their squares |
|             | Beta for ignoring variables          | (0.5, 0.999) | Adam coefficients used for computing gradients and their squares |
|             | Max epoch                            | 120          | -                                                                |
|             | Batch size                           | 16           | -                                                                |

Table 9: Hyperparameter settings for Method 2

| Name          | Value        | Description                                                      |
|---------------|--------------|------------------------------------------------------------------|
| Optimizer     | Adam         | -                                                                |
| Learning rate | 0.01         | Cosine scheduling                                                |
| Beta          | (0.5, 0.999) | Adam coefficients used for computing gradients and their squares |
| Max epoch     | 200          | -                                                                |
| Batch size    | 256          | -                                                                |

Table 10: Hyperparameter settings for Method 2 with ignoring

| Name                                 | Value        | Description                                                      |
|--------------------------------------|--------------|------------------------------------------------------------------|
| Optimizer                            | Adam         | -                                                                |
| Optimizer for ignoring variables     | Adam         | -                                                                |
| Learning rate                        | 0.1          | Cosine scheduling                                                |
| Learning rate for ignoring variables | 0.01         | Weight decay with a rate of 3e-4                                 |
| Beta                                 | (0.9, 0.999) | Adam coefficients used for computing gradients and their squares |
| Beta for ignoring variables          | (0.5, 0.999) | Adam coefficients used for computing gradients and their squares |
| Max epoch                            | 180          | -                                                                |
| Batch size                           | 64           | -                                                                |

Table 11: Hyperparameter settings for Method 2 with CMSSL-IQ

|             | Name          | Value               | Description                                                      |
|-------------|---------------|---------------------|------------------------------------------------------------------|
| Pretraining | Optimizer     | Adam                | -                                                                |
|             | Learning rate | 0.1                 | Cosine scheduling                                                |
|             | <b>Beta</b>   | <b>(0.5, 0.999)</b> | Adam coefficients used for computing gradients and their squares |
|             | Max epoch     | 120                 | -                                                                |
|             | Batch size    | 256                 | -                                                                |
| Finetuning  | Optimizer     | Adam                | -                                                                |
|             | Learning rate | 0.01                | Cosine scheduling                                                |
|             | <b>Beta</b>   | <b>(0.5, 0.999)</b> | Adam coefficients used for computing gradients and their squares |
|             | Max epoch     | 200                 | -                                                                |
|             | Batch size    | 256                 | -                                                                |

Table 12: Hyperparameter settings for Method 2 with CMSSL-IA

|             | Name          | Value               | Description                                                      |
|-------------|---------------|---------------------|------------------------------------------------------------------|
| Pretraining | Optimizer     | Adam                | -                                                                |
|             | Learning rate | 0.1                 | Cosine scheduling                                                |
|             | <b>Beta</b>   | <b>(0.5, 0.999)</b> | Adam coefficients used for computing gradients and their squares |
|             | Max epoch     | 120                 | -                                                                |
|             | Batch size    | 256                 | -                                                                |
| Finetuning  | Optimizer     | Adam                | -                                                                |
|             | Learning rate | 0.01                | Cosine scheduling                                                |
|             | <b>Beta</b>   | <b>(0.5, 0.999)</b> | Adam coefficients used for computing gradients and their squares |
|             | Max epoch     | 200                 | -                                                                |
|             | Batch size    | 256                 | -                                                                |

Table 13: Hyperparameter settings for Method 2 with SSL-QA

|             | Name          | Value               | Description                                                      |
|-------------|---------------|---------------------|------------------------------------------------------------------|
| Pretraining | Optimizer     | Adam                | -                                                                |
|             | Learning rate | 0.1                 | Cosine scheduling                                                |
|             | <b>Beta</b>   | <b>(0.5, 0.999)</b> | Adam coefficients used for computing gradients and their squares |
|             | Max epoch     | 120                 | -                                                                |
|             | Batch size    | 256                 | -                                                                |
| Finetuning  | Optimizer     | Adam                | -                                                                |
|             | Learning rate | 0.01                | Cosine scheduling                                                |
|             | <b>Beta</b>   | <b>(0.5, 0.999)</b> | Adam coefficients used for computing gradients and their squares |
|             | Max epoch     | 200                 | -                                                                |
|             | Batch size    | 256                 | -                                                                |

Table 14: Hyperparameter settings for Method 2 with joint pretraining

|             | Name          | Value               | Description                                                      |
|-------------|---------------|---------------------|------------------------------------------------------------------|
| Pretraining | Optimizer     | Adam                | -                                                                |
|             | Learning rate | 0.0001              | Cosine scheduling                                                |
|             | <b>Beta</b>   | <b>(0.5, 0.999)</b> | Adam coefficients used for computing gradients and their squares |
|             | Max epoch     | 30                  | -                                                                |
|             | Batch size    | 256                 | -                                                                |
| Finetuning  | Optimizer     | Adam                | -                                                                |
|             | Learning rate | 0.00005             | Cosine scheduling                                                |
|             | <b>Beta</b>   | <b>(0.9, 0.999)</b> | Adam coefficients used for computing gradients and their squares |
|             | Max epoch     | 200                 | -                                                                |
|             | Batch size    | 256                 | -                                                                |

Table 15: Hyperparameter settings for Method 2 with joint pretraining+ignoring

|             | Name                                 | Value               | Description                                                      |
|-------------|--------------------------------------|---------------------|------------------------------------------------------------------|
| Pretraining | Optimizer                            | Adam                | -                                                                |
|             | Learning rate                        | 0.0001              | Cosine scheduling                                                |
|             | <b>Beta</b>                          | <b>(0.5, 0.999)</b> | Adam coefficients used for computing gradients and their squares |
|             | Max epoch                            | 120                 | -                                                                |
|             | Batch size                           | 256                 | -                                                                |
| Finetuning  | Optimizer                            | Adam                | -                                                                |
|             | Optimizer for ignoring variables     | Adam                | -                                                                |
|             | Learning rate                        | 0.00005             | Cosine scheduling                                                |
|             | Learning rate for ignoring variables | 0.1                 | Weight decay with a rate of 3e-4                                 |
|             | <b>Beta</b>                          | <b>(0.9, 0.999)</b> | Adam coefficients used for computing gradients and their squares |
|             | <b>Beta for ignoring variables</b>   | <b>(0.5, 0.999)</b> | Adam coefficients used for computing gradients and their squares |
|             | Max epoch                            | 180                 | -                                                                |
|             | Batch size                           | 64                  | -                                                                |

## 4 FILES CONTAINING TRAINED MODELS

Files containing trained models are listed in Table 16.

Table 16: Trained models for different methods

| Name                                     | Links                                       |
|------------------------------------------|---------------------------------------------|
| Faster RCNN pretrained on BCCD           | faster_rcnn_res101_bccd.pth <sup>2</sup>    |
| Method 1 without image                   | Method 1/m1_no_image.pth <sup>2</sup>       |
| Method 1                                 | Method 1/m1.pth <sup>2</sup>                |
| Method 1 with ignoring                   | Method 1/m1_ignoring.pth <sup>2</sup>       |
| Method 1 with CMSSL-IQ                   | Method 1/m1_IQ.pth <sup>2</sup>             |
| Method 1 with CMSSL-IA                   | Method 1/m1_IA.pth <sup>2</sup>             |
| Method 1 with SSL-QA                     | Method 1/m1_QA.pth <sup>2</sup>             |
| Method 1 with joint pretraining          | Method 1/m1_joint.pth <sup>2</sup>          |
| Method 1 with joint pretraining+ignoring | Method 1/m1_joint_ignoring.pth <sup>2</sup> |
| Method 2 without image                   | Method 2/m2_no_image.pth <sup>2</sup>       |
| Method 2                                 | Method 2/m2.pth <sup>2</sup>                |
| Method 2 with ignoring                   | Method 2/m2_ignoring.pth <sup>2</sup>       |
| Method 2 with CMSSL-IQ                   | Method 2/m2_IQ.pth <sup>2</sup>             |
| Method 2 with CMSSL-IA                   | Method 2/m2_IA.pth <sup>2</sup>             |
| Method 2 with SSL-QA                     | Method 2/m2_QA.pth <sup>2</sup>             |
| Method 2 with joint pretraining          | Method 2/m2_joint.pth <sup>2</sup>          |
| Method 2 with joint pretraining+ignoring | Method 2/m2_joint_ignoring.pth <sup>2</sup> |

<sup>2</sup><https://drive.google.com/drive/folders/1tTibOSHNCmMc9rXD7xIwWV4F41ee3A0w?usp=sharing>

## 5 TRAINING TIME

Table 17 shows the training time for each experiment using GTX 1080ti GPUs with the hyper-parameter settings described above.

Table 17: Training time for different experiments

| Name                                     | Training time |
|------------------------------------------|---------------|
| Method 1 without image                   | 5 hour        |
| Method 1                                 | 13 hour       |
| Method 1 with ignoring                   | 34 hour       |
| Method 1 with CMSSL-IQ                   | 21 hour       |
| Method 1 with CMSSL-IA                   | 24 hour       |
| Method 1 with SSL-QA                     | 23 hour       |
| Method 1 with joint pretraining          | 36 hour       |
| Method 1 with joint pretraining+ignoring | 57 hour       |
| Method 2 without image                   | 1.5 hour      |
| Method 2                                 | 3 hour        |
| Method 2 with ignoring                   | 17 hour       |
| Method 2 with CMSSL-IQ                   | 4 hour        |
| Method 2 with CMSSL-IA                   | 4 hour        |
| Method 2 with SSL-QA                     | 3 hour        |
| Method 2 with joint pretraining          | 11 hour       |
| Method 2 with joint pretraining+ignoring | 25 hour       |

## 6 PARAMETER NUMBERS

Table 18 shows the parameter numbers for different models.

Table 18: Parameter number of different model

| Model                                    | Parameter numbers |
|------------------------------------------|-------------------|
| Method 1 without image                   | 120 million       |
| Method 1                                 | 238 million       |
| Method 1 with ignoring                   | 238 million       |
| Method 1 with CMSSL-IQ                   | 257 million       |
| Method 1 with CMSSL-IA                   | 257 million       |
| Method 1 with SSL-QA                     | 257 million       |
| Method 1 with joint pretraining          | 257 million       |
| Method 1 with joint pretraining+ignoring | 258 million       |
| Method 2 without image                   | 137 million       |
| Method 2                                 | 84 million        |
| Method 2 with ignoring                   | 84 million        |
| Method 2 with CMSSL-IQ                   | 93 million        |
| Method 2 with CMSSL-IA                   | 93 million        |
| Method 2 with SSL-QA                     | 137 million       |
| Method 2 with joint pretraining          | 138 million       |
| Method 2 with joint pretraining+ignoring | 138 million       |
